# Supplementary material for: RNA-sequencing analysis reveals betalains metabolism in the leaf of Amaranthus tricolor L
Source: PLoS One. 2019 Apr 25;14(4):e0216001. doi: 10.1371/journal.pone.0216001 (PMC6483260; doi:10.1371/journal.pone.0216001)
Supplement: S1 Table — (XLS) [file pone.0216001.s001.xls]

## Sheet: Sheet1
Supplementary Table1 Top 10 significantly altered GO enrichment related pathways identified in the process of betalains metabolism
Biological process
GO.ID		Term	Annotated		Significant		Expected		KS
GO:0000278		mitotic cell cycle	200		1		8.37		5.5e-06
GO:0007062		sister chromatid cohesion	54		1		2.26		2.1e-05
GO:0006310		DNA recombination	189		7		7.91		3.6e-05
GO:0009560		embryo sac egg cell differentiation	51		0		2.13		4e-05
GO:0006464		cellular protein modification process	2024		74		84.72		4.5e-05
GO:0009765		photosynthesis, light harvesting	104		15		4.35		9e-05
GO:0006886		intracellular protein transport	713		16		29.84		0.00014
GO:0051726		regulation of cell cycle	169		9		7.07		0.0003
GO:0006396		RNA processing	745		19		31.18		0.00035
GO:0006302		double-strand break repair	55		0		2.3		0.00042
Cellular component
GO:0010287		plastoglobule	136		10		5.01		6.8e-06
GO:0016021		integral component of membrane	1771		85		65.21		1.3e-05
GO:0009535		chloroplast thylakoid membrane	576		34		21.21		2.8e-05
GO:0009654		photosystem II oxygen evolving complex	55		3		2.03		3.7e-05
GO:0005576		extracellular region	902		85		33.21		7.9e-05
GO:0009522		photosystem I	89		9		3.28		0.00071
GO:0009534		chloroplast thylakoid	716		40		26.36		0.00093
GO:0022625		cytosolic large ribosomal subunit	176		0		6.48		0.00272
GO:0044427		chromosomal part	122		1		4.49		0.00303
GO:0009517		PSII associated light-harvesting complex II	8		1		0.29		0.00318
Molecular function
GO:0016168		chlorophyll binding	70		11		3.16		7.6e-05
GO:0031559		oxidosqualene cyclase activity	8		3		0.36		0.00015
GO:0032440		2-alkenal reductase NAD(P) activity	216		15		9.76		0.00015
GO:0003735		structural constituent of ribosome	714		1		32.27		0.00028
GO:0008173		RNA methyltransferase activity	19		0		0.86		0.00033
GO:0048529		magnesium-protoporphyrin IX monomethyl ester (oxidative) cyclase activity	10		1		0.45		0.00045
GO:0046873		metal ion transmembrane transporter activity	186		11		8.41		0.00083
GO:0004715		non-membrane spanning protein tyrosine kinase activity	59		4		2.67		0.00089
GO:0008408		3'-5' exonuclease activity	26		0		1.18		0.00141
GO:0016491		oxidoreductase activity	2523		189		114.02		0.00189
Note：GO.ID：Number of GO node；Term：Name of GO node；Annotated：Number of all genes annotated on the function；Significant：Number of DEG annotated on the function；Expected：Expected value of DEG annotated on the function；KS：The significance statistics of the enrichment node.
