# Supplementary material for: RNA-sequencing analysis reveals betalains metabolism in the leaf of Amaranthus tricolor L
Source: PLoS One. 2019 Apr 25;14(4):e0216001. doi: 10.1371/journal.pone.0216001 (PMC6483260; doi:10.1371/journal.pone.0216001)
Supplement: S2 Table — (XLS) [file pone.0216001.s002.xls]

## Sheet: Sheet1
Supplementary Table 2 Hormone metabolism related DEGs between red and green sectors of A. tricolor leaf
Am. tricolor	Log2FC	Arabidopsis	BinName	Description
c44874.graph_c0	-4.86333	at1g04580	ABA synthesis-degradation	AAO4; aldehyde oxidase
c19786.graph_c0	4.68005	at3g14440	ABA synthesis-degradation	9-cis-epoxycarotenoid dioxygenase
c43675.graph_c0	5.2609	at1g52340	ABA2	short chain alcohol dehydrogenmase
c17297.graph_c0	-4.44859	at2g27150	abscisic aldehyde oxidase	AAO3/abscisic aldehyde oxidase
c28767.graph_c0	-4.51658	at4g19230	degradation.8-hydroxylase	abscisic acid 8'-hydroxylase/ oxygen binding
c49150.graph_c0	4.93373	at2g47770	ABA induced-regulated -responsive-activated	benzodiazepine receptor-related
c26352.graph_c0	3.82872	at5g38970	BA synthesis-degradation	BR6OX1, ATBR6OX, CYP85A1, BR6OX
c18962.graph_c0	3.23108	at1g20330	BA synthesis-degradation	S-adenosylmethionine-dependent methyltransferase
c38528.graph_c0	3.30845	at1g76090	BA synthesis-degradation	S-adenosylmethionine-dependent methyltransferase
c31650.graph_c0	3.55107	at2g07050	BA synthesis-degradation	cycloartenol synthase
c19991.graph_c0	4.61302	at4g37760	BA synthesis-degradation	squalene monooxygenase
c30816.graph_c0	3.18825	at3g63440	cytokinin.synthesis-degradation	cytokinin dehydrogenase
c29028.graph_c0	-6.56339	at1g05160	gibberelin.synthesis-degradation	CYTOCHROME P450 88 A3
c32764.graph_c0	-6.98919	at2g32440	gibberelin.synthesis-degradation	CYP88A4
c11988.graph_c0	5.73287	at4g25420	gibberelin.synthesis-degradation	gibberellin 20-oxidase
c8377.graph_c0	6.40977	at1g30040	gibberelin.synthesis-degradation	gibberellin 2-beta-dioxygenase
c12403.graph_c0	4.62893	at5g14920	gibberelin.induced-regulated -responsive-activated	gibberellin-regulated family protein
c26921.graph_c0	-6.96202	at3g55560	gibberelin.induced-regulated-responsive-activated	AT-hook protein of GA feedback 2
c35586.graph_c0	9.54586	at1g74670	gibberelin.induced-regulated-responsive-activated	gibberellin-responsive protein
c32446.graph_c2	5.86466	at2g39540	gibberelin.induced-regulated-responsive-activated	gibberellin-regulated family protein
c36967.graph_c0	4.03348	at1g75750	gibberelin.induced-regulated-responsive-activated	GAST1 PROTEIN HOMOLOG 1
c31015.graph_c0	-4.17433	at1g55020	jasmonate.synthesis-degradation	LOX1 | LOX1; lipoxygenase
c37192.graph_c0	-3.79036	at1g72520	jasmonate.synthesis-degradation	lipoxygenase
c34358.graph_c0	-6.81563	at3g45140	jasmonate.synthesis-degradation	LOX2;lipoxygenase
c37787.graph_c0	-4.19252	at1g67560	jasmonate.synthesis-degradation	lipoxygenase family protein
c24550.graph_c0	4.0862	at1g76690	jasmonate.synthesis-degradation	OPR2, ATOPR2
c30726.graph_c0	-3.83894	at4g36470	SA synthesis-degradation	S-adenosyl-L-methionine:carboxy
c27896.graph_c0	3.9581	at1g05680	SA synthesis-degradation	UDP-glucosyl transferase family protein
c18635.graph_c1	9.35083	at5g54000	ethylene.synthesis	oxygenase family protein
c18635.graph_c0	7.78366	at5g20400	ethylene.synthesis	oxygenase family protein
c41103.graph_c0	-6.50692	at3g23240	ethylene.synthesis	ETHYLENE RESPONSE FACTOR
c32270.graph_c0	6.51052	at1g15360	ethylene.synthesis	transcription factor
c8168.graph_c0	-5.84099	at4g31980	ethylene.synthesis	unknown protein
c39628.graph_c0	3.60401	at3g16050	ethylene. induced-regulated -responsive-activated	protein heterodimerization
c17304.graph_c0	3.80101	at3g24500	ethylene. induced-regulated -responsive-activated	transcription factor
