# Supplementary material for: RNA-sequencing analysis reveals betalains metabolism in the leaf of Amaranthus tricolor L
Source: PLoS One. 2019 Apr 25;14(4):e0216001. doi: 10.1371/journal.pone.0216001 (PMC6483260; doi:10.1371/journal.pone.0216001)
Supplement: S3 Table — (XLS) [file pone.0216001.s003.xls]

## Sheet: Sheet1
Supplementary Table 3 Photosynthesis DEGs between red and green sectors of A. tricolor leaf
A. tricolor	Log2FC	Arabidopsis	BinName	Description
c34182.graph_c0	4.25194	at5g54270	photosystem II.LHC	LIGHT-HARVESTING CHLOROPHYLL B-BINDING PROTEIN 3
c34213.graph_c0	6.03787	at2g34420	photosystem II.LHC	LHB1B2; chlorophyll binding
c34127.graph_c0	3.74681	at2g34430	photosystem II.LHC	LHB1B1, LHCB1.4; chlorophyll binding
c20726.graph_c0	5.2276	at3g27690	photosystem II.LHC	LHCB2.4, LHCB2.3; chlorophyll binding
c32263.graph_c0	4.45354	at2g05100	photosystem II.LHC	LHCB2.1, LHCB2 ; chlorophyll binding
c34124.graph_c0	3.74241	at4g10340	photosystem II.LHC	LIGHT HARVESTING COMPLEX OF PHOTOSYSTEM II 5
c26493.graph_c0	4.85532	at1g29930	photosystem II.LHC	CHLOROPHYLL A/B BINDING PROTEIN 1
c34159.graph_c0	4.31737	at5g01530	photosystem II.LHC	chlorophyll A-B binding protein CP29 (LHCB4)
c38043.graph_c0	7.78353	at1g77090	photosystemII.PSII polypeptide subunits	thylakoid lumenal 29.8 kDa protein
c36001.graph_c0	5.62947	at1g51400	photosystemII.PSII polypeptide subunits	photosystem II 5 kD protein
c34319.graph_c0	6.40112	at1g67740	photosystemII.PSII polypeptide subunits	PSBY, YCF32
c34651.graph_c0	3.56316	at4g28660	photosystemII.PSII polypeptide subunits	PHOTOSYSTEM II REACTION CENTER PSB28 PROTEIN
c34168.graph_c0	3.96364	at1g79040	photosystemII.PSII polypeptide subunits	photosystem II subunit R
c31077.graph_c0	4.84409	at1g61520	photosystem I.LHC	LHCA3; chlorophyll binding
c34447.graph_c0	3.76009	at1g19150	hotosystem I.LHC	LHCA6; chlorophyll binding
c34173.graph_c0	3.73061	at5g64040	PSI polypeptide subunits	PSAN; calmodulin binding
c34156.graph_c0	4.40414	at1g30380	PSI polypeptide subunits	photosystem I subunit K
c34751.graph_c0	3.21855	at4g09650	ATP synthase.delta chain	ATP SYNTHASE DELTA-SUBUNIT GENE
c10825.graph_c0	4.68503	at1g20340	other electron carrier (ox/red).plastocyanin	DRT112; copper ion binding / electron carrier
c12313.graph_c0	4.17717	at1g02180	other electron carrier (ox/red).ferredoxin	FERREDOXIN 1 ; 2 iron, 2 sulfur cluster binding / electron carrier/ iron-sulfur cluster
c34759.graph_c0	8.48811	at1g10960	other electron carrier (ox/red).ferredoxin	proton gradient regulation 5
c40314.graph_c0	4.52579	at4g02630	state transition	protein kinase family protein
c34725.graph_c0	8.70068	at2g05620	cyclic electron flow-chlororespiration	proton gradient regulation 5
c34412.graph_c0	4.6794	at3g26650	calvin .GAP	GLYCERALDEHYDE 3-PHOSPHATE DEHYDROGENASE A SUBUNIT
c34489.graph_c0	4.63552	at1g12900	calvin .GAP	GLYCERALDEHYDE 3-PHOSPHATE DEHYDROGENASE A SUBUNIT 2
c34136.graph_c0	3.97549	at2g21330	calvin .aldolase	fructose-bisphosphate aldolase
c34161.graph_c0	3.85363	at4g38970	calvin .aldolase	fructose-bisphosphate aldolase
c37315.graph_c0	5.01737	at3g60750	calvin cyle.transketolase	transketolase
c39980.graph_c0	4.02025	at1g32060	calvin cyle.PRK	HOSPHORIBULOKINASE
c34820.graph_c0	3.35687	at1g55490	calvin cyle.rubisco interacting	CHAPERONIN 60 BETA
