# Supplementary material for: RNA-sequencing analysis reveals betalains metabolism in the leaf of Amaranthus tricolor L
Source: PLoS One. 2019 Apr 25;14(4):e0216001. doi: 10.1371/journal.pone.0216001 (PMC6483260; doi:10.1371/journal.pone.0216001)
Supplement: S4 Table — (XLS) [file pone.0216001.s004.xls]

## Sheet: Sheet1
Supplementary Table 4 Sucrose and starch metabolism related DEGs between red and green sectors of A. tricolor leaf
Am. tricolor	Log2FC	Arabidopsis	BinName	Description
c11310.graph_c0	3.70514	at1g27680	metabolism.synthesis.starch	APL2/glucose-1-phosphate adenylyltransferase
c38113.graph_c0	3.82045	at1g32900	metabolism.synthesis.starch	starch synthase
c36568.graph_c0	7.40169	at4g15210	metabolism.degradation.starch	beta-amylase
c30136.graph_c0	3.45518	at1g10760	metabolism.degradation.starch	alpha-glucan, water dikinase
c26596.graph_c0	-3.65121	at3g13790	metabolism.degradation.sucrose	beta-fructofuranosidase
c10942.graph_c0	-3.51807	at2g19860	metabolism.degradation.sucrose	ATP binding
c33445.graph_c0	3.35076	at1g73370	metabolism.degradation.sucrose	UDP-glycosyltransferase/ sucrose synthase
c36362.graph_c0	-4.55105	at4g02280	metabolism.degradation.sucrose	UDP-glycosyltransferase/ sucrose synthase
