# Supplementary material for: RNA-sequencing analysis reveals betalains metabolism in the leaf of Amaranthus tricolor L
Source: PLoS One. 2019 Apr 25;14(4):e0216001. doi: 10.1371/journal.pone.0216001 (PMC6483260; doi:10.1371/journal.pone.0216001)
Supplement: S5 Table — Table a Primers for validating the accuracy of RNA-Seq data and betalains related metabolisms. Table b Primers used for gene expression analysis related to betalains and flavonoid by qRT PCR. (XLS) [file pone.0216001.s005.xls]

## Sheet: Supplementary Table 1a
Supplementary Table 1a Primers for validating the accuracy of RNA-Seq data and betalains related metabolisms
Unigene ID	Sense Primer（5′-3′）	Reverse primer（5′-3′）
c44874.graph_c0	CATTCTGTGATTGCTCGTTG	ATGCCTTTCCTCCAAACC
c26352.graph_c0	CATCTCAGCAACTGGCAAA	AAAGAGTCCCAACAACAAGC
c11988.graph_c0	CAAGTTGGTGGTCTTCAAGTG	CTCCCATTTGTTAGTGCCA
c37787.graph_c0	CTTATGCTGCTGATGGGCT	ATCCGAGGTGATGGCACTA
c18635.graph_c1	CGTAATAATCTGAGTTCCTGGG	CACTTCCATACCCTTCAATCC
c34213.graph_c0	ACATTTACAGGGCAGGCAGT	GGTGAGATAGGATGGTGGCT
c31077.graph_c0	TAAGCAAGGAGCAAACAGACC	TCTCACCATAGGCTAACCACC
c36568.graph_c0	AGCAAGGAGCAAACAGACC	TCTCACCATAGGCTAACCACC
c36362.graph_c0	ACCATACGGCTTTCACTTTG	GTGTTCATCGTTCTGTTCAGG
c34409.graph_c0	CAATGCTACTCCTACTATGCCTTC	TGTGAGAATAAGTCTGTGCCCT
c44874.graph_c0	TTAGATGGAAAGGTTACCGC	CCAGTCATACTTCTTGAGGGTT
EF1a	GGGATGCTGGTATGGTGAA	ACGGGTCATTTCTTCTTCTGAG

## Sheet: Supplementary Table 1b
Table 1b Primers used for gene expression analysis related to betalains and flavonoid by qRT PCR
Gene name	Sense Primer（5′-3′）	Reverse primer（5′-3′）
DODA	CCTGCTCCCATGTACCAGTTCA	GCACCATGATCAAGTCCTCG
B5-GT	CCTCTTAGCTCCAACAGGTACAC	GACTCATTGTGGATGGAATTCG
cDOPA5-GT	CTGGAGAGTTCAAACCCGAA	CCACCCTATTATCGGAACACCT
TyDC	CAGGGTTTGTGCTTCTGCTG	CCATCAACGAGTGAGTGAGTCA
CYP76AD1	CCTCATCGTTCATTCGCA	TCTTTGGCAACTTCTGCTGA
CATPO	GGTGTTCTTCACGAGAGATGC	AGTGTTGAGACTTTCTGGGAGG
PAL	CGAGCAACACAACCAAGATG	GACCAGGAAAGTGGAGGACAT
CHS	AGTCTTGTGAGGATGGGAAA	CACCAATGGGAACACTTTG
F3H	CAGGCTGTGGTGAACTCAA	GGTCCTTGCTCATCTTCCTC
FS	GGTGGTGAGGAAATGGTGTA	TAAATCAGTGTGAGCAGGCA
WRKY13	GGAAGAAGGGAAAGAAGCA	TTGACCATACTTACGCCATC
EF1a	GGGATGCTGGTATGGTGAA	ACGGGTCATTTCTTCTTCTGAG
